# Supplementary material for: Antarctic Subglacial Trace Metal Mobility Linked to Climate Change Across Termination III
Source: Copernicus journal article supplement (doi:10.5194/egusphere-2024-1359), 2024-05-27

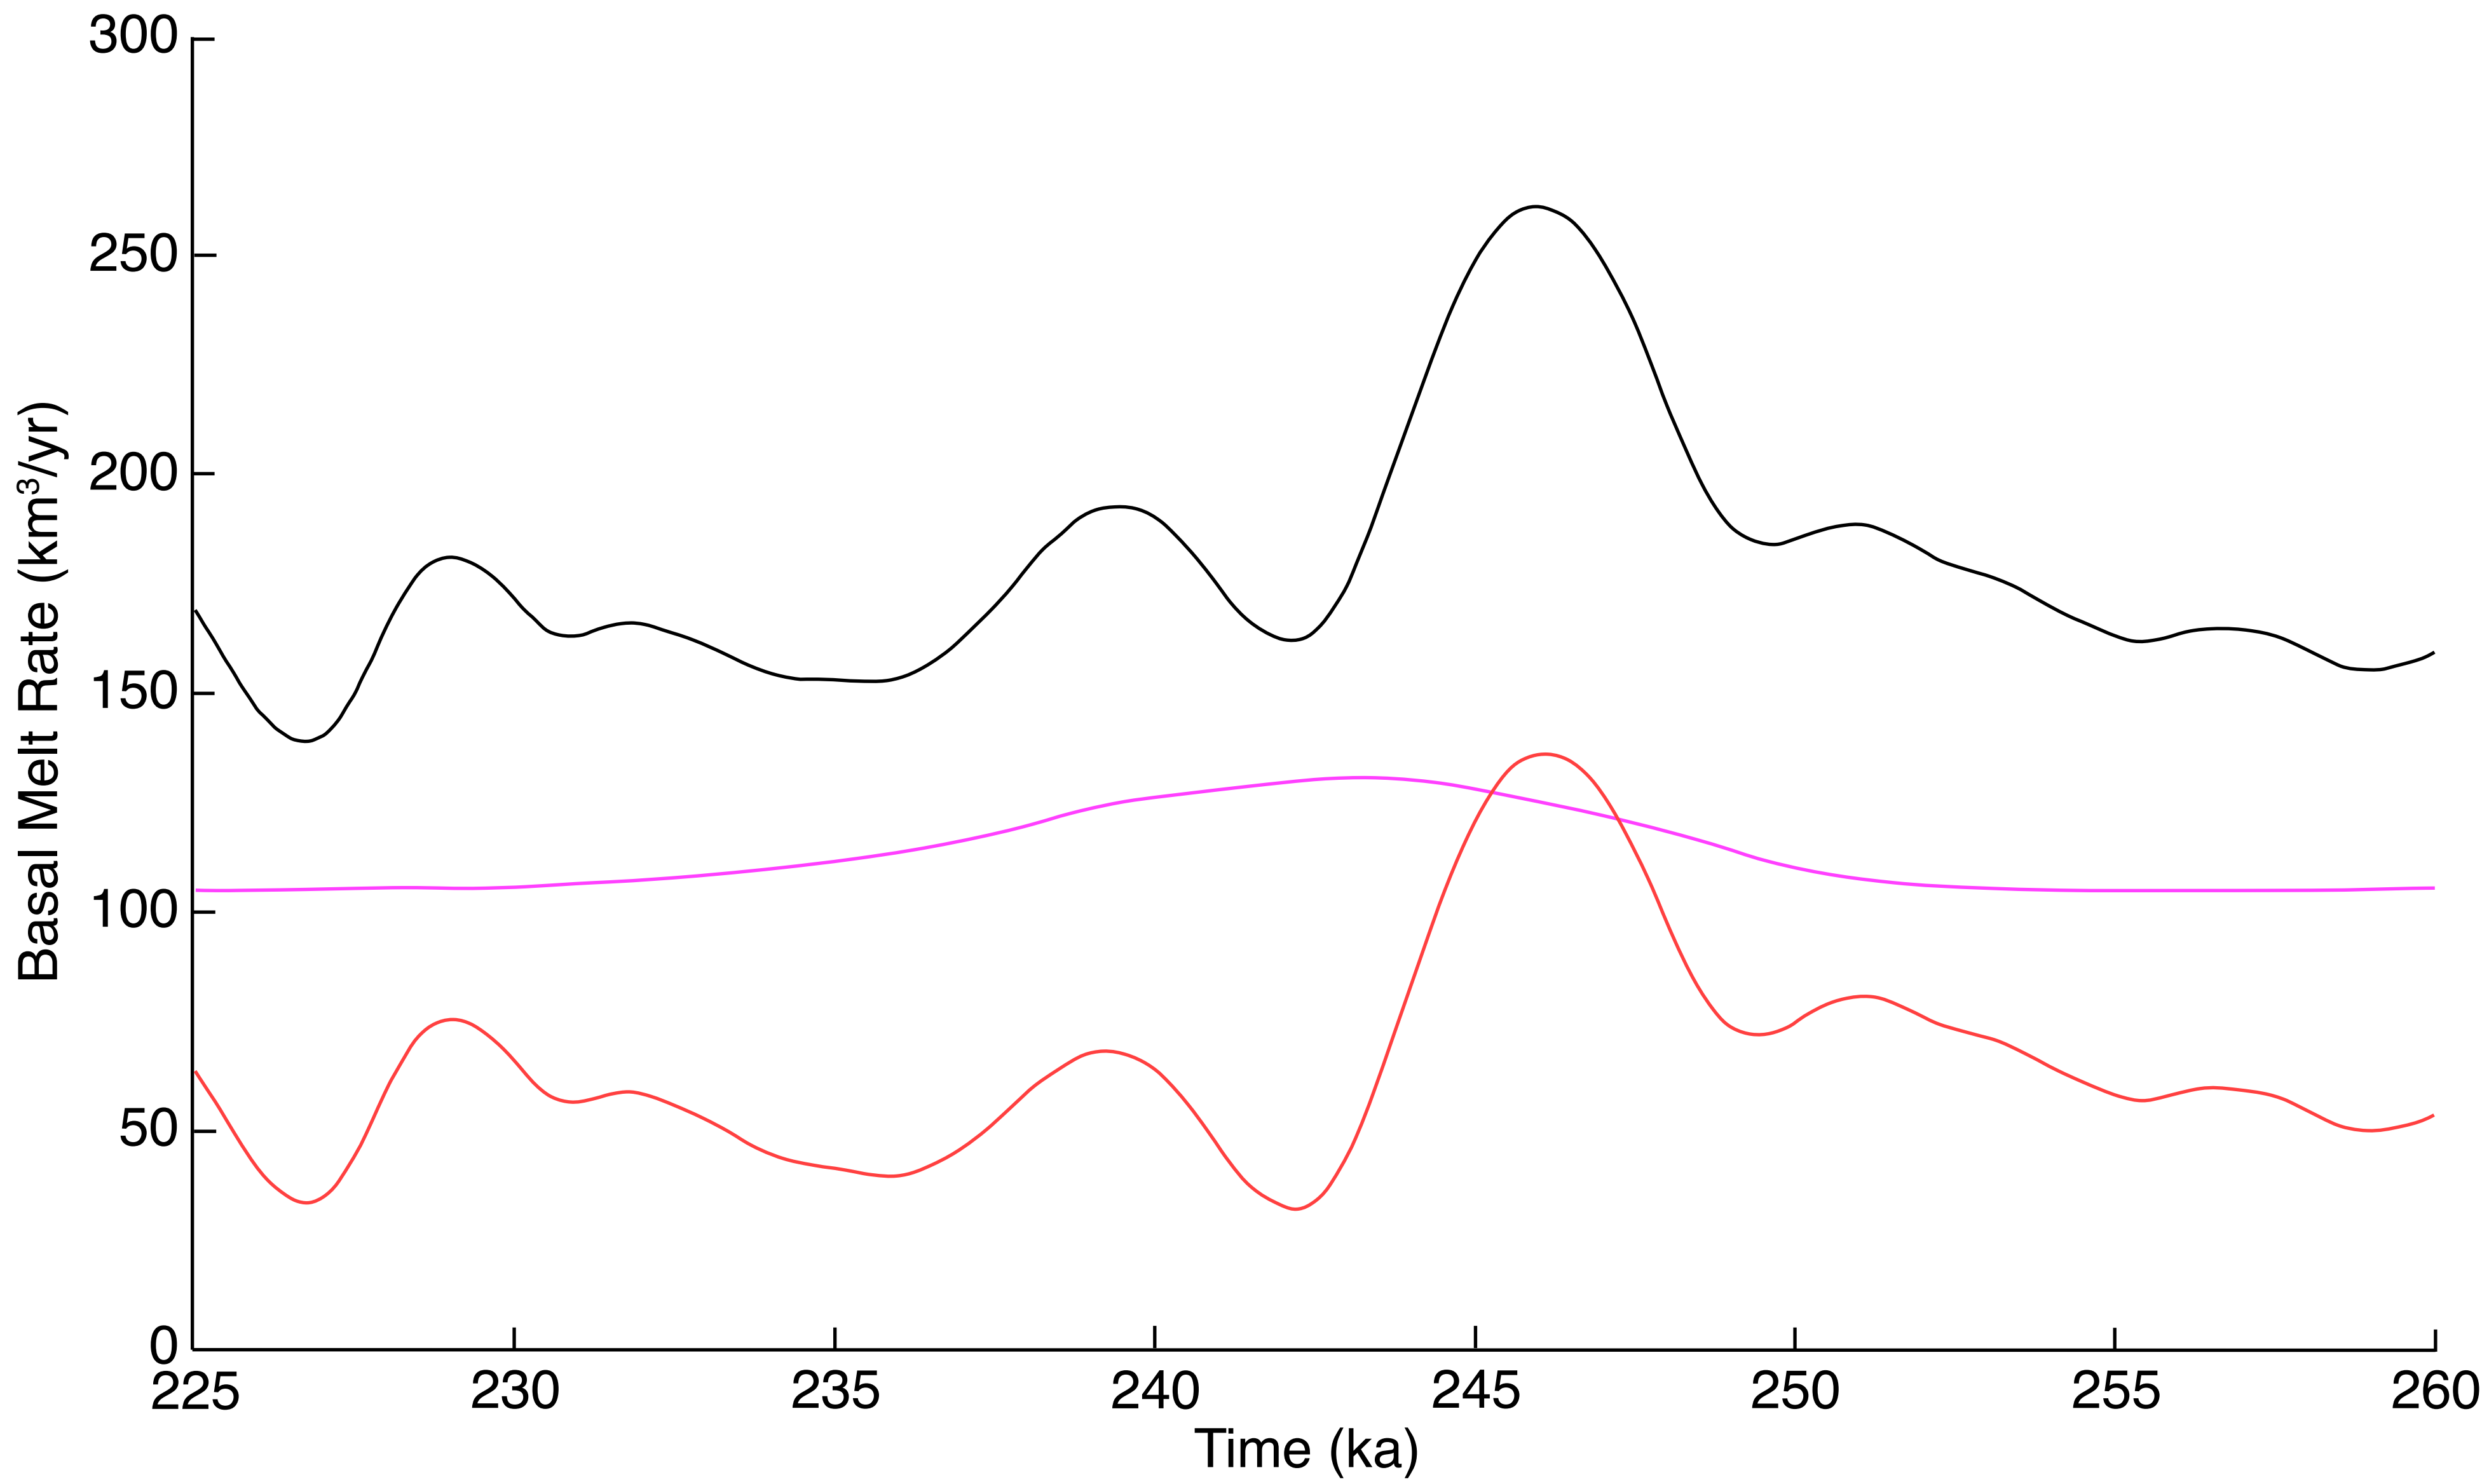

Supplement: Supplementary file [file egusphere-2024-1359-AC3-supplement.pdf]
